# Supplementary material for: The state of knowledge of Polish teachers about oral health and methods of preventing tooth decay in children – a sociomedical survey
Source: Research Square preprint supplement (doi:10.21203/rs.3.rs-7177274/v1), 2025-08-22
Supplement: Supplementary file 1 [file 880498c61c006a54f9d3bf94.pdf]

# "MONITORING THE ORAL HEALTH OF THE POLISH POPULATION"

## INTERVIEW QUESTIONNAIRE FOR THE TEACHER

Identification number

Results from this **anonymous** research will contribute to better dental care for children, so please give us honest answers. Please mark the correct answer with an X in the prepared box: ☒

1. Please indicate the voivodeship

- ☐ Łódź
- ☐ Masovian
- ☐ Silesian
- ☐ Lublin
- ☐ Subcarpathian
- ☐ Podlaskie
- ☐ Świętokrzyskie
- ☐ Lubuskie
- ☐ Greater Poland
- ☐ West pomeranian
- ☐ Lower Silesian
- ☐ Opole
- ☐ Kuyavian-Pomeranian
- ☐ Pomeranian
- ☐ Warmian-Masurian

2. Please indicate your place of residence and gender: CITY ☐ VILLAGE ☐ MALE ☐ FEMALE ☐

3. Please indicate your age

- ☐ ≤ 30 years ☐
- ☐ 31-40 years old ☐
- ☐ 41-50 years old ☐
- ☐ 51-60 years old ☐
- ☐ > 60 years old ☐

4. Please indicate the period of professional practice?

- ☐ ≤5 years
- ☐ 6-10 years
- ☐ 11-20 years
- ☐ >20 years

5. How would you describe your knowledge of oral health and methods of preventing tooth decay in children?

- ☐ Fully sufficient (very good)
- ☐ Sufficient
- ☐ Limited (small)
- ☐ Insufficient (very small)

6. Have you participated in training on oral health and caries prevention in children?

Yes ☐ No ☐

7. Do you think that teachers should conduct classes on children's dental issues?

Yes ☐ No ☐

**8. Have you conducted didactic classes for children on children's dental issues?**

Yes ☐ No ☐

**9. If you have conducted such a class, please indicate the subject matter:**

- ☐ Eating a "healthy" diet for your teeth
- ☐ The role of sugar in the development of tooth decay
- ☐ Teeth cleaning
- ☐ The importance of healthy teeth
- ☐ Teeth and mouth
- ☐ Visits to the dentist
- ☐ Other

**10. How do you assess the degree of your own preparation to educate children about oral health?**

- ☐ Very good
- ☐ Good
- ☐ Average
- ☐ Bad
- ☐ Very bad

**11. How often should a child have check-ups at the dentist?**

- ☐ every 3 months
- ☐ every 6 months
- ☐ every year
- ☐ in case of signs of caries

**12. At what age should a child have their first visit to the dentist?**

- ☐ 6 -12 months of age
- ☐ 2 years of age
- ☐ 3 years of age
- ☐ > 3 years of age

**13. Please specify whether the statement is true or false**

|                                             | True                     | False                    |
|---------------------------------------------|--------------------------|--------------------------|
| Tooth decay is caused by pregnancy          | <input type="checkbox"/> | <input type="checkbox"/> |
| Tooth decay is a hereditary disease         | <input type="checkbox"/> | <input type="checkbox"/> |
| Tooth decay is caused by general diseases   | <input type="checkbox"/> | <input type="checkbox"/> |
| Tooth decay is a parasitic disease          | <input type="checkbox"/> | <input type="checkbox"/> |
| Tooth decay is caused by bacteria and sugar | <input type="checkbox"/> | <input type="checkbox"/> |

**14. At what age should a child start teeth cleaning?**

- ☐ from the eruption of the first tooth
- ☐ at the age of 2
- ☐ at the age of 3
- ☐ when he or she reaches the age of 3

**15. At what age can a child be introduced to clean their teeth with fluoride?**

- ☐ from the eruption of the first tooth  
☐ at the age of 2  
☐ at the age of 3  
☐ when he or she reaches the age of 3

**16. Can children aged 5 use ?**

- |                                                 |                              |                             |
|-------------------------------------------------|------------------------------|-----------------------------|
| fluoride rinses                                 | YES <input type="checkbox"/> | NO <input type="checkbox"/> |
| sonic toothbrush                                | YES <input type="checkbox"/> | NO <input type="checkbox"/> |
| electric toothbrush                             | YES <input type="checkbox"/> | NO <input type="checkbox"/> |
| dental floss                                    | YES <input type="checkbox"/> | NO <input type="checkbox"/> |
| fluoride varnish (with a high fluoride content) | YES <input type="checkbox"/> | NO <input type="checkbox"/> |
| fluoride gel (with a high fluoride content)     | YES <input type="checkbox"/> | NO <input type="checkbox"/> |

**18. Should a preschool child brush their teeth on their own?**

YES ☐ NO ☐ DON'T KNOW ☐

**19. If you think that an adult should help your child clean their teeth, how should they do it?  
 (please indicate one or more answers)**

- ☐ Holding the toothbrush together with the child while brushing  
☐ Teeth are cleaned by an adult  
☐ At the same time, the child **and the adult clean their teeth** on their own  
☐ Check your teeth after cleaning  
☐ Use verbal instructions  
☐ Pay attention to the time of brushing your teeth  
☐ Apply toothpaste to the toothbrush

**20. Please indicate food products / drinks that promote tooth decay ?**

- |                                                                 |                          |
|-----------------------------------------------------------------|--------------------------|
| Fresh fruit                                                     | <input type="checkbox"/> |
| Vegetables.                                                     | <input type="checkbox"/> |
| Biscuits, biscuits, cakes, donuts, cakes, sweet rolls, biscuits | <input type="checkbox"/> |
| Candies, bars                                                   | <input type="checkbox"/> |
| Jam / honey                                                     | <input type="checkbox"/> |
| Chewing gum with sugar                                          | <input type="checkbox"/> |
| Sugar-free chewing gums                                         | <input type="checkbox"/> |
| Juices                                                          | <input type="checkbox"/> |
| Xylito                                                          | <input type="checkbox"/> |
| Sweetened sodas (e.g. cola, lemonade)                           | <input type="checkbox"/> |
| Tea with sugar                                                  | <input type="checkbox"/> |
| Sugar-free tea                                                  | <input type="checkbox"/> |

|                                  |                          |
|----------------------------------|--------------------------|
| Milk or cocoa with sugar         | <input type="checkbox"/> |
| Salted chips, sticks or crackers | <input type="checkbox"/> |
| Mineral water                    | <input type="checkbox"/> |
| Unsweetened milk                 | <input type="checkbox"/> |
| Natural yoghurts                 | <input type="checkbox"/> |
| Yogurts/fruit cheeses            | <input type="checkbox"/> |
| Raisins                          | <input type="checkbox"/> |
| Muesli                           | <input type="checkbox"/> |
| French fries                     | <input type="checkbox"/> |
| Hard cheeses                     | <input type="checkbox"/> |

**PLEASE RESPOND TO EACH STATEMENT:**

**21. Children should have regular check-ups at the dentist**

- ☐ yes  
☐ no  
☐ I do not know

**23. Excessive sugar consumption causes tooth decay**

- ☐ yes  
☐ no  
☐ I do not know

**25. Children should use fluoride compounds that protect against caries**

- ☐ yes  
☐ no  
☐ I do not know

**27. Tooth decay in deciduous teeth "transfers" to permanent teeth**

- ☐ yes  
☐ no  
☐ I do not know

**22. Frequent eating between main meals promotes tooth decay**

- ☐ yes  
☐ no  
☐ I do not know

**24. Children under 10 years old need adult help to clean their teeth**

- ☐ yes  
☐ no  
☐ I do not know

**26. Milk teeth do not require as much care as permanent teeth, because they will soon fall out**

- ☐ yes  
☐ no  
☐ I do not know

**28. Parents should limit giving sweets and sugary drinks to their children**

- ☐ yes  
☐ no  
☐ I do not know

**29. Please indicate effective ways to prevent tooth decay?**

- ☐ Tooth decay cannot be prevented
- ☐ Rinsing with water
- ☐ Using toothpicks
- ☐ Flossing
- ☐ Brushing your teeth
- ☐ Regular visits to the dentist
- ☐ Avoiding sugar
- ☐ Xylitol use
- ☐ Use of special medications
- ☐ Use of fluoride compounds
- ☐ The use of herbal rinses
- ☐ Less frequent snacking

**If you would like to share your observations on dental issues concerning a child, please do so here:**

.....

***Thank you for your answer***

If you have any doubts, please contact the person conducting the study directly for help.
